# Supplementary figures and images for: Measuring respiratory symptoms of COPD: performance of the EXACT- Respiratory Symptoms Tool (E-RS) in three clinical trials
Source: Springer Nature journal article supplement (doi:10.1186/s12931-014-0124-z), 2014-10-06

## Improvement Indicator

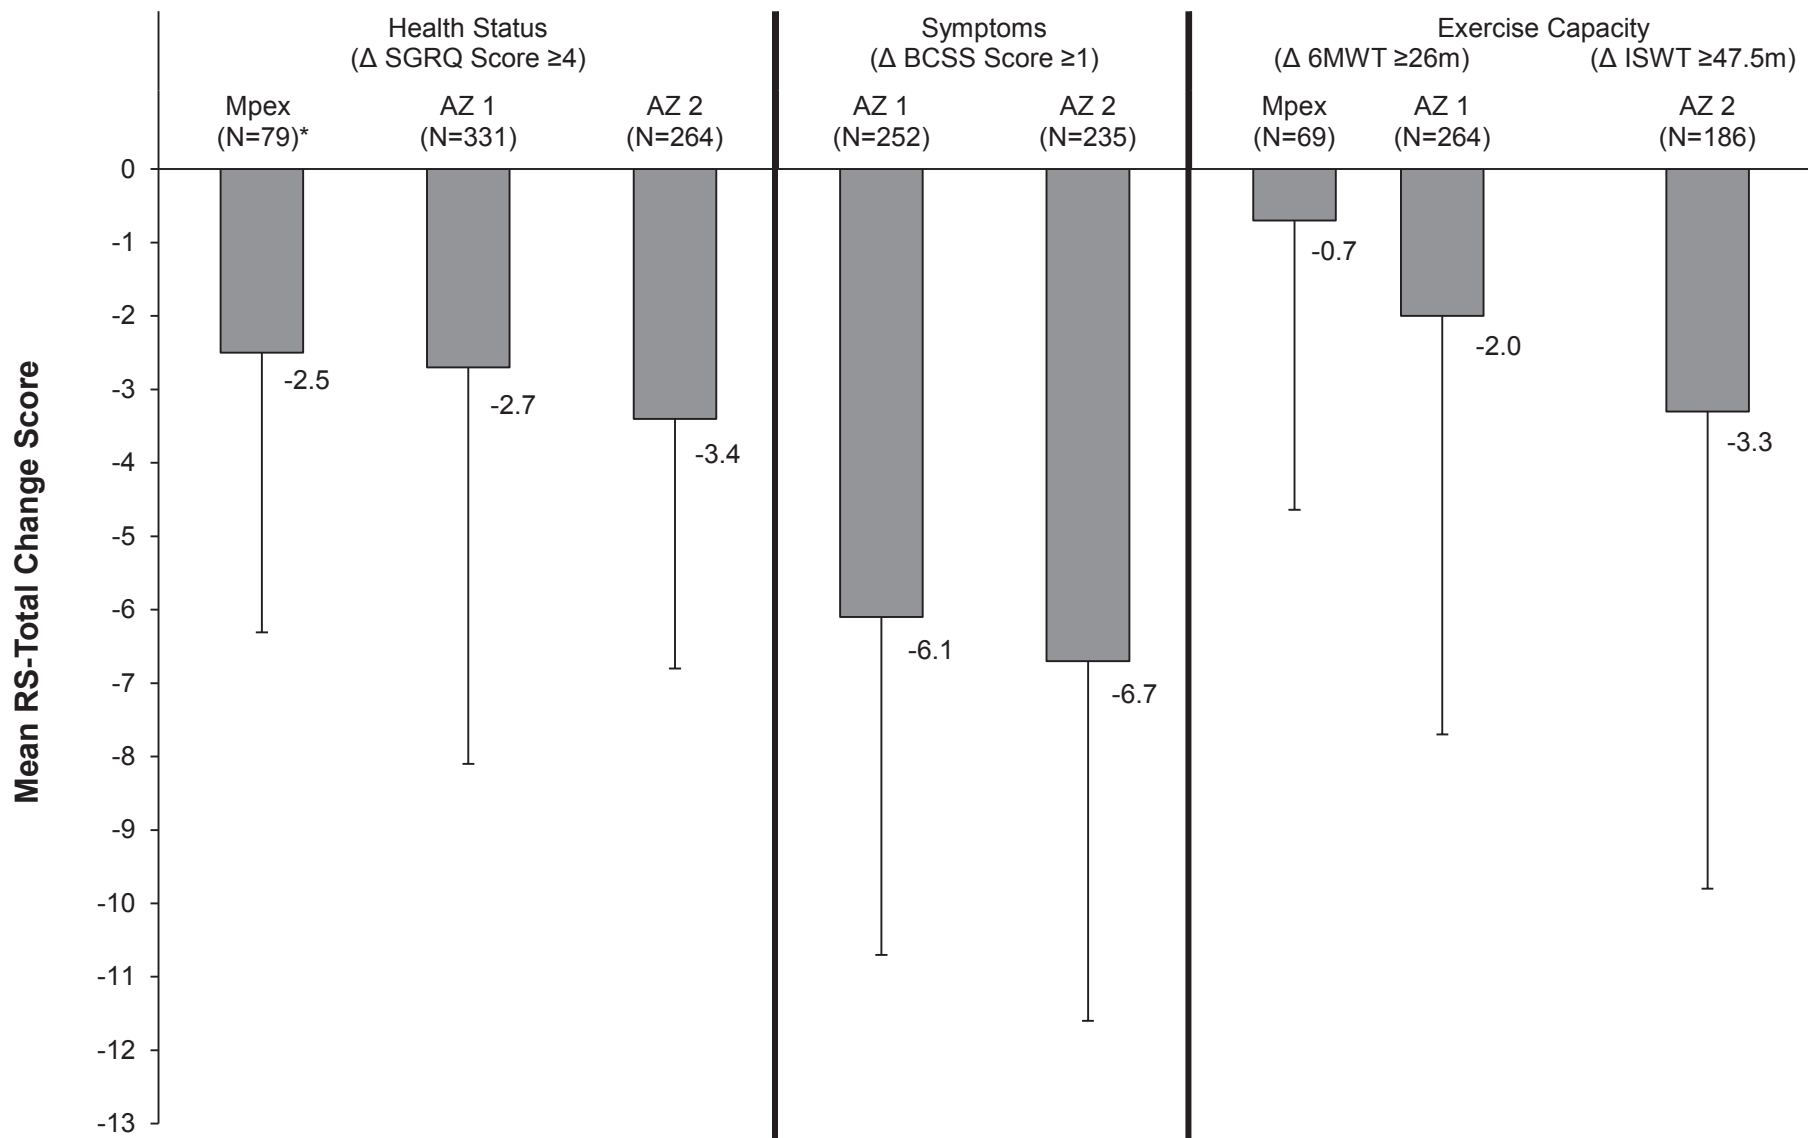

|                    |      |      |      |      |      |      |      |      |
|--------------------|------|------|------|------|------|------|------|------|
| <b>% Change</b>    | 18   | 13   | 17   | 34   | 34   | 2    | 9    | 15   |
| <b>Effect Size</b> | 0.41 | 0.44 | 0.61 | 1.06 | 1.17 | 0.12 | 0.34 | 0.52 |

Supplement: MOESM4 [file 9759484]

### Improvement Indicator

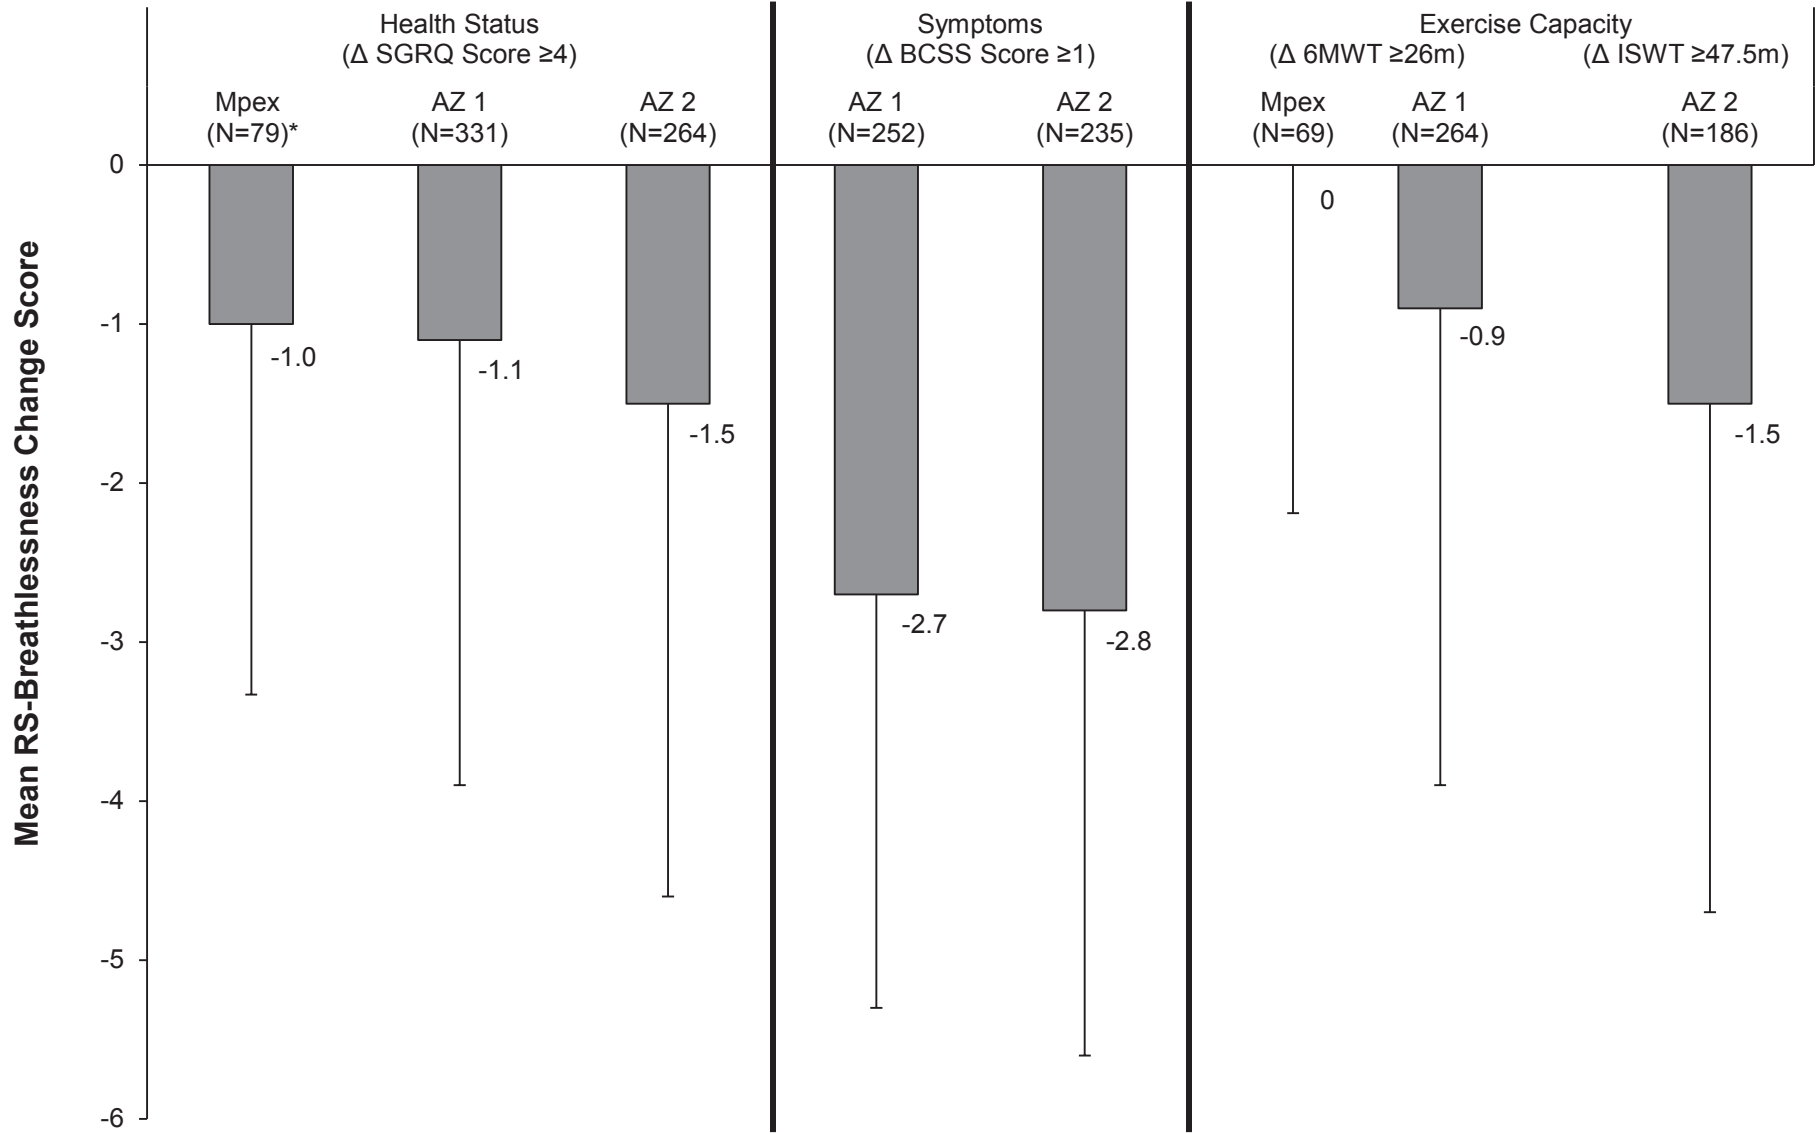

|                    |      |      |      |      |      |      |      |      |
|--------------------|------|------|------|------|------|------|------|------|
| <b>% Change</b>    | 17   | 10   | 15   | 31   | 30   | 3    | 9    | 12   |
| <b>Effect Size</b> | 0.27 | 0.35 | 0.50 | 0.88 | 0.93 | 0.01 | 0.29 | 0.45 |

Supplement: MOESM5 [file 9759484]

### Improvement Indicator

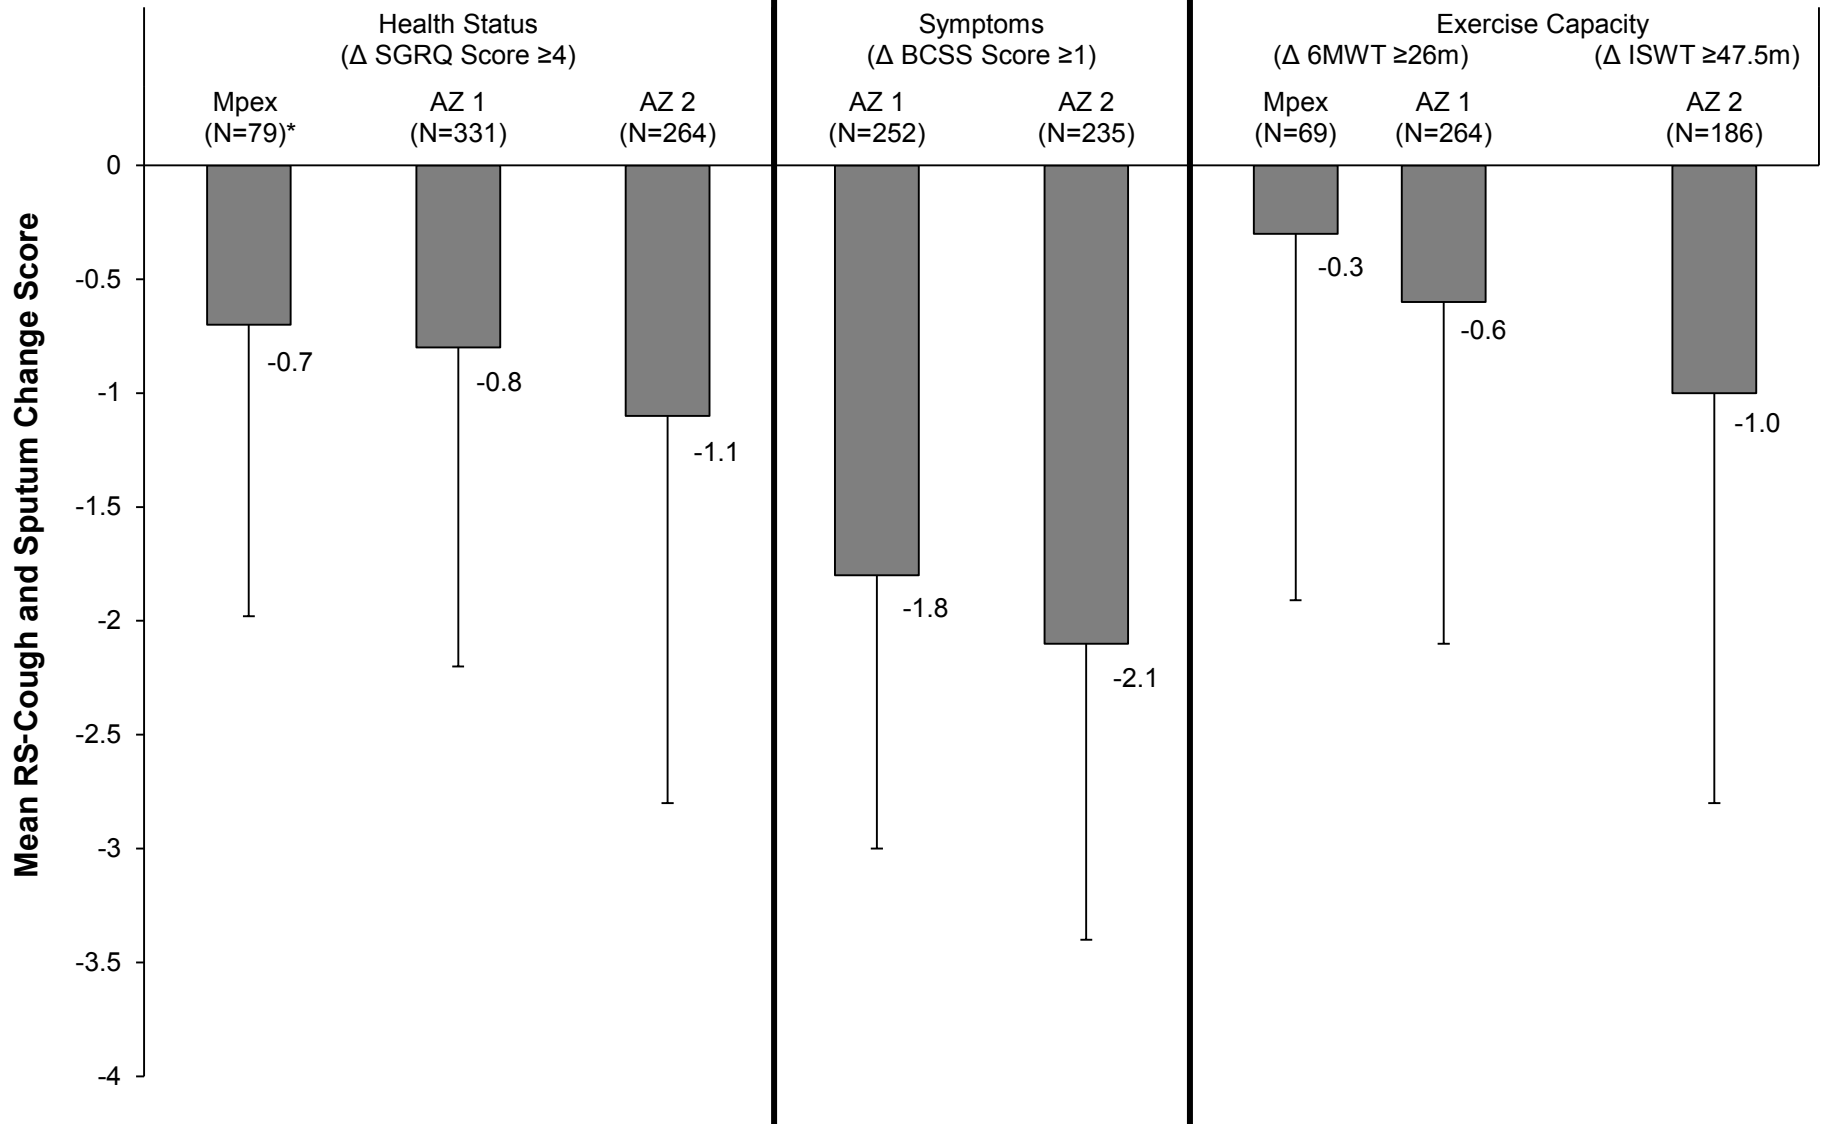

|                    |      |      |      |      |      |      |      |      |
|--------------------|------|------|------|------|------|------|------|------|
| <b>% Change</b>    | 13   | 17   | 20   | 37   | 41   | 14   | 12   | 18   |
| <b>Effect Size</b> | 0.54 | 0.53 | 0.72 | 1.16 | 1.42 | 0.19 | 0.42 | 0.60 |

Supplement: MOESM6 [file 9759484]

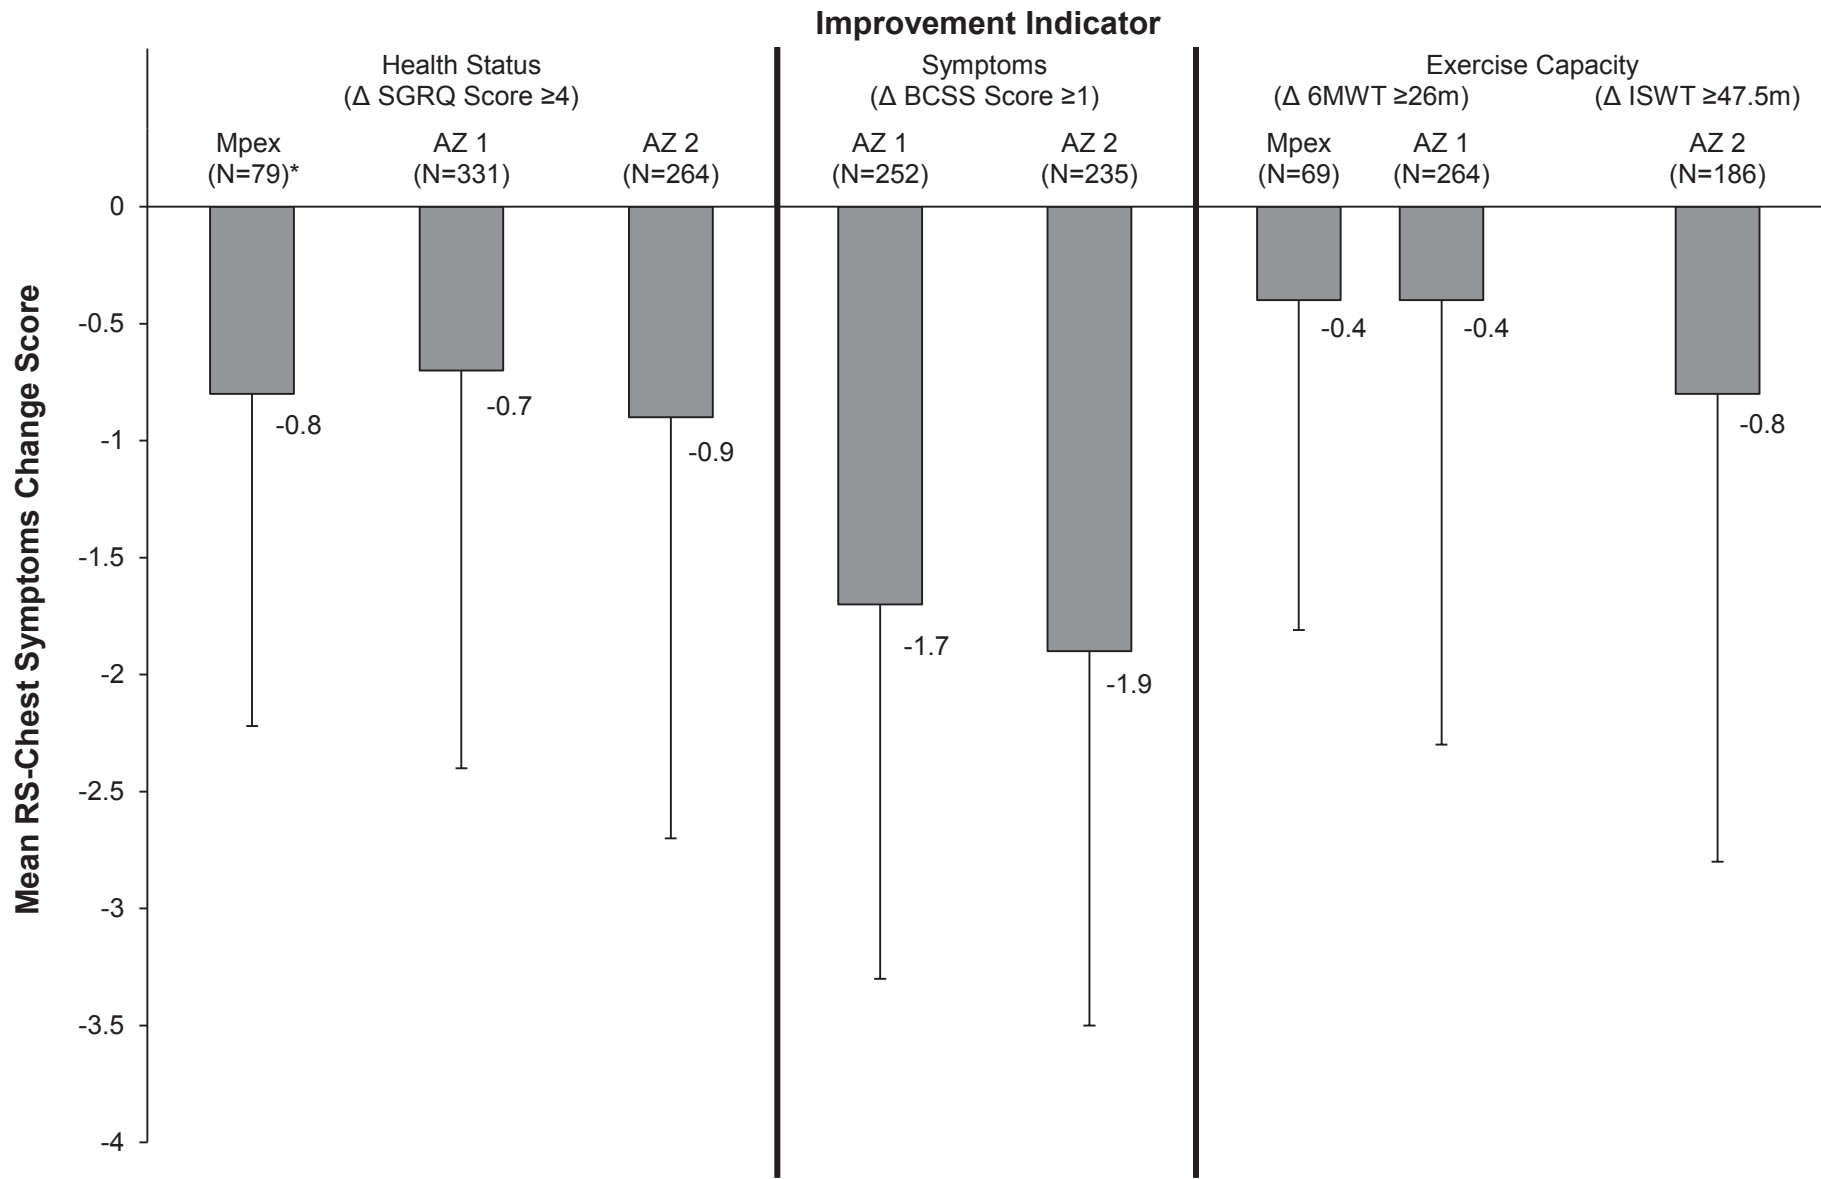

|                    |      |      |      |      |      |      |      |      |
|--------------------|------|------|------|------|------|------|------|------|
| <b>% Change</b>    | 14   | 8    | 15   | 35   | 35   | 14   | 2    | 11   |
| <b>Effect Size</b> | 0.42 | 0.39 | 0.51 | 0.91 | 1.06 | 0.19 | 0.24 | 0.44 |

Supplement: MOESM7 [file 9759484]
